# Supplementary material for: Geographical Factors Affecting Bed Net Ownership, a Tool for the Elimination of Anopheles-Transmitted Lymphatic Filariasis in Hard-to-Reach Communities
Source: PubMed Central journal article supplement (PMC3538722; doi:10.1371/journal.pone.0053755), 2013-01-07
Supplement: pone.0053755.s001.pdf [file pone.0053755.s001.pdf]

**Table S1: DHS and GRUMP urban/rural classification summaries.** Summaries of bed net ownership and demographic and transport network variables by DHS and GRUMP urban/rural classification.

| Attribute                          | DHS category  |     |               |     | GRUMP category |      |               |     |      |     |     |      |
|------------------------------------|---------------|-----|---------------|-----|----------------|------|---------------|-----|------|-----|-----|------|
|                                    | Urban (n=115) |     | Rural (n=145) |     | Urban (n=80)   |      | Rural (n=180) |     |      |     |     |      |
|                                    | Median        | IQR | Median        | IQR | Median         | IQR  | Median        | IQR |      |     |     |      |
| <b><i>Bed net summaries</i></b>    |               |     |               |     |                |      |               |     |      |     |     |      |
| Any bed net coverage               | 43            | 17  | 53            | 17  | 7              | 40   | 43            | 19  | 53   | 17  | 7   | 43   |
| ITN coverage                       | 10            | 3   | 20            | 3   | 0              | 10   | 10            | 7   | 20   | 3   | 0   | 11   |
| ITN density (per 100 pop.)         | 2             | 1   | 4             | 1   | 0              | 2    | 2             | 1   | 4    | 1   | 0   | 2    |
| <b><i>Demographic features</i></b> |               |     |               |     |                |      |               |     |      |     |     |      |
| Pop. density                       | 210           | 23  | 6366          | 23  | 10             | 41   | 1112          | 79  | 7953 | 23  | 10  | 43   |
| Distance to health facility        | 17            | 10  | 21            | 55  | 15             | 120  | 15            | 10  | 20   | 31  | 15  | 95   |
| Distance to nearest major city     |               |     |               | 491 | 307            | 626  | 17            | 7   | 580  | 480 | 281 | 626  |
| Distance to Kinshasa               | 691           | 15  | 1210          | 975 | 538            | 1306 | 526           | 10  | 1190 | 956 | 481 | 1305 |
| Distance to Kinshasa/Kisangani     | 393           | 14  | 754           | 525 | 374            | 685  | 334           | 8   | 685  | 520 | 323 | 739  |
| Distance to Kinshasa/Lubumbashi    | 365           | 10  | 806           | 745 | 399            | 959  | 190           | 8   | 756  | 732 | 334 | 958  |
| <b><i>Transport features</i></b>   |               |     |               |     |                |      |               |     |      |     |     |      |
| Distance to national Road          | 5             | 2   | 145           | 88  | 40             | 231  | 3             | 1   | 87   | 86  | 32  | 227  |
| Distance to railway                | 23            | 8   | 165           | 147 | 57             | 246  | 16            | 7   | 88   | 138 | 50  | 242  |
| Distance to main waterways         | 150           | 8   | 363           | 252 | 128            | 375  | 13            | 7   | 361  | 256 | 128 | 386  |
| Distance to airport                | 9             | 5   | 80            | 114 | 76             | 155  | 7             | 4   | 11   | 107 | 62  | 148  |
