# Supplementary material for: Geographical Factors Affecting Bed Net Ownership, a Tool for the Elimination of Anopheles-Transmitted Lymphatic Filariasis in Hard-to-Reach Communities
Source: PubMed Central journal article supplement (PMC3538722; doi:10.1371/journal.pone.0053755), 2013-01-07
Supplement: pone.0053755.s002.pdf [file pone.0053755.s002.pdf]

**Table S2: Rural bed net ownership by population density and distance from Lubumbashi/Kinshasa.** Bed net ownership summaries by population density category (greater or less than 23 per km<sup>2</sup>) and distance from Lubumbashi/Kinshasa category (greater or less than 400km) for rural clusters.

| Interaction                       | Median | 95% CI |    |
|-----------------------------------|--------|--------|----|
| <b>Any bed net coverage</b>       |        |        |    |
| Cities >400km, pop. density >23   | 13     | 10     | 30 |
| Cities >400km, pop. density <23   | 13     | 3      | 39 |
| Cities <400km, pop. density >23   | 37     | 7      | 53 |
| Cities <400km, pop. density <23   | 15     | 10     | 53 |
| <b>ITN coverage</b>               |        |        |    |
| Cities >400km, pop. density>23    | 3      | 3      | 7  |
| Cities >400km, pop. density<23    | 0      | 0      | 3  |
| Cities <400km, pop. density>23    | 16     | 3      | 36 |
| Cities <400km, pop. density<23    | 10     | 5      | 10 |
| <b>ITN density (per 100 pop.)</b> |        |        |    |
| Cities >400km, pop. density >23   | 2      | 1      | 1  |
| Cities >400km, pop. density <23   | 0      | 0      | 1  |
| Cities <400km, pop. density >23   | 4      | 1      | 1  |
| Cities <400km, pop. density <23   | 1      | 1      | 1  |
